# Supplementary material for: Expression of the β-glucosidase gene Pgβglu-1 underpins natural resistance of white spruce against spruce budworm
Source: PubMed Central journal article supplement — Plant J. 2014 Nov 6;81(1):68–80. doi: 10.1111/tpj.12699 (PMC4404995; doi:10.1111/tpj.12699), 2014-11-06
Supplement: tpj0081-0068-sd2.pdf [file tpj0081-0068-sd2.pdf]

**Table S2.** Variations in *Pgβglu-1* amino acid sequence of resistant (R) and non-resistant (N-R) trees. Sites are considered variable if two or more variants are observed among the 14 sequences.

| Test trees | Variable sites <sup>1</sup> |                 |     |     |     |                  |     |     |     |     |                  |     |                  |     |     |     |     |     |     |
|------------|-----------------------------|-----------------|-----|-----|-----|------------------|-----|-----|-----|-----|------------------|-----|------------------|-----|-----|-----|-----|-----|-----|
|            | 14                          | 98 <sup>2</sup> | 117 | 176 | 212 | 251 <sup>2</sup> | 268 | 309 | 310 | 312 | 342 <sup>2</sup> | 344 | 365 <sup>2</sup> | 377 | 384 | 385 | 412 | 417 | 439 |
| NR-1       | L                           | K               | Q   | I/L | I   | T                | L   | S   | M   | S   | A/E/P/Q          | Y/D | Q/R              | V   | S   | S   | T   | G   | H/Y |
| NR-2       | L                           | K               | Q   | I/L | I/L | I/L/S/T          | L   | F/S | M   | S   | A/E/P/Q          | Y/D | Q/R              | I/V | S   | A/S | T   | G   | H/Y |
| NR-3       | L                           | K               | Q   | I/L | I/L | T                | L   | S   | M   | S   | P/Q/S/*          | Y/D | Q                | I/V | G/S | A/S | T   | A/G | H/Y |
| NR-4       | L/F                         | K               | Q   | I/L | I/L | I/L/S/T          | L   | F/S | M/L | S   | A/E/P/Q          | Y/D | Q/R              | I/V | G/S | A/S | T   | G   | Y   |
| NR-5       | L                           | K               | Q   | I/L | I   | I/S              | L   | S   | M   | S   | P/Q              | Y   | Q/R              | V   | S   | A/S | T   | G   | H/Y |
| NR-6       | L                           | K               | Q   | I/L | I   | T                | F/L | F/S | M/L | R/S | E/Q              | Y   | Q                | I/V | S   | S   | T   | G   | H/Y |
| NR-7       | L                           | K               | Q   | I   | I   | T                | L   | S   | M   | S   | Q                | Y   | Q                | V   | S   | S   | N/T | G   | Y   |
| R-1        | L                           | K/R             | Q   | I/L | I/L | I/L/S/T          | L   | F/S | M   | R/S | S                | D   | Q/R              | I/V | S   | A/S | T   | A/G | Y   |
| R-2        | L                           | K               | Q   | I/L | I/L | I/L/S/T          | L   | S   | M   | S   | P/Q/S/*          | Y/D | Q/R              | I/V | S   | A/S | T   | G   | Y   |
| R-3        | L/F                         | K               | Q/E | I/L | I/L | I/L/S/T          | L   | S   | M   | S   | A/E/P/Q          | Y/D | Q/R              | I/V | S   | S   | T   | G   | H/Y |
| R-4        | L                           | K               | Q   | I/L | I/L | I/L/S/T          | L   | S   | M   | S   | A/E/P/Q/S/*      | Y/D | Q/R              | I/V | S   | S   | T   | A/G | H/Y |
| R-5        | L                           | K               | Q   | I/M | I/L | I/L/S/T          | L   | S   | M   | S   | P/Q/S/*          | Y/D | L/Q/R            | I/V | S   | S   | T   | A/G | H/Y |
| R-6        | L                           | K/R/T           | Q/E | I/M | I/L | T                | F/L | S   | M   | S   | S/*              | Y/D | Q                | I/V | S   | S   | N/T | G   | H   |
| R-7        | L                           | K               | Q   | L/V | I   | T                | L   | S   | M   | S   | E/Q              | Y/D | Q                | I/V | S   | S   | T   | G   | Y   |

<sup>1</sup> The number above each site indicates their position in the coding sequence (see Fig. S2). Amino acid sequences were obtained by translating exons of the genomic sequence.

<sup>2</sup> Sites containing two variable DNA nucleotides resulting in more than two different codons and predicted amino acids. A stop codon was observed at site 342 in five of the trees but none of the trees were homozygous for a stop.
