# Supplementary material for: Expression of the β-glucosidase gene Pgβglu-1 underpins natural resistance of white spruce against spruce budworm
Source: PubMed Central journal article supplement — Plant J. 2014 Nov 6;81(1):68–80. doi: 10.1111/tpj.12699 (PMC4404995; doi:10.1111/tpj.12699), 2014-11-06
Supplement: tpj0081-0068-sd4.pdf [file tpj0081-0068-sd4.pdf]

**Table S2.** Comparison of single nucleotide polymorphisms in coding sequences of the *Pgβglu-1* gene in resistant (R) and non-resistant (N-R) trees. dN/dS indicates the ratio of non-synonymous to synonymous polymorphism.

| Trees            | Non-Synonymous<br>(N) | Synonymous<br>(S) |
|------------------|-----------------------|-------------------|
| <b>R</b>         |                       |                   |
| 1                | 16                    | 7                 |
| 2                | 8                     | 5                 |
| 6                | 12                    | 8                 |
| 9                | 16                    | 8                 |
| 11               | 10                    | 7                 |
| 15               | 14                    | 7                 |
| Mean (R trees)   | 12.7                  | 7.0               |
| <b>N-R</b>       |                       |                   |
| 3                | 4                     | 6                 |
| 4                | 12                    | 8                 |
| 7                | 9                     | 5                 |
| 10               | 13                    | 6                 |
| 12               | 4                     | 4                 |
| 16               | 5                     | 1                 |
| 17               | 2                     | 3                 |
| Mean (N-R trees) | 7.0                   | 4.7               |
