# Supplementary material for: Expression of the β-glucosidase gene Pgβglu-1 underpins natural resistance of white spruce against spruce budworm
Source: PubMed Central journal article supplement — Plant J. 2014 Nov 6;81(1):68–80. doi: 10.1111/tpj.12699 (PMC4404995; doi:10.1111/tpj.12699), 2014-11-06
Supplement: tpj0081-0068-sd5.pdf [file tpj0081-0068-sd5.pdf]

**Table S3.** White spruce provenances sampled for the population survey.

| Sites                   | Lat (°N) | Long (°W) | Number of individuals |
|-------------------------|----------|-----------|-----------------------|
| Beauceville             | 46.13    | 70.82     | 1                     |
| Bois Franc Pierriche    | 46.55    | 71.52     | 1                     |
| Canton Booth            | 46.78    | 78.70     | 1                     |
| Canton Boyer            | 46.58    | 75.17     | 5                     |
| Canton Chaumonot        | 47.92    | 72.92     | 1                     |
| Canton Cimon            | 48.28    | 71.00     | 1                     |
| Canton Dasserat         | 48.22    | 79.48     | 1                     |
| Canton Desaulniers      | 46.75    | 73.08     | 4                     |
| Canton Hébecourt        | 48.53    | 79.30     | 1                     |
| Canton McGill           | 46.25    | 75.58     | 1                     |
| Carleton                | 48.12    | 66.12     | 1                     |
| Davis Mills             | 45.75    | 77.25     | 1                     |
| Havelock                | 44.43    | 77.83     | 1                     |
| Kamouraska              | 47.48    | 69.97     | 2                     |
| Lambton                 | 45.93    | 71.12     | 2                     |
| Parc Chibougamau        | 48.83    | 72.83     | 2                     |
| Parc des Laurentides    | 47.20    | 71.23     | 1                     |
| Racine                  | 45.50    | 72.27     | 2                     |
| Shannonville            | 44.23    | 77.25     | 1                     |
| Ste-Émilie de l'Énergie | 46.37    | 73.72     | 1                     |
| St-Roch-de-Mékinac      | 46.75    | 72.77     | 2                     |
| Valcartier              | 46.95    | 71.50     | 1                     |
| Whitney                 | 45.53    | 78.27     | 1                     |
