# Supplementary material for: Expression of the β-glucosidase gene Pgβglu-1 underpins natural resistance of white spruce against spruce budworm
Source: PubMed Central journal article supplement — Plant J. 2014 Nov 6;81(1):68–80. doi: 10.1111/tpj.12699 (PMC4404995; doi:10.1111/tpj.12699), 2014-11-06
Supplement: tpj0081-0068-sd6.pdf [file tpj0081-0068-sd6.pdf]

**Table S4.** Primer sequences used for quantitative PCR analysis, molecular cloning, and sequencing assays.

| Assays                                 | Primer ID                 | Sequences (5' -->3')        | Tm   | Position <sup>4</sup><br>in cDNA | Position <sup>4</sup><br>in gDNA | Primer<br>Pair<br>Name |
|----------------------------------------|---------------------------|-----------------------------|------|----------------------------------|----------------------------------|------------------------|
| RT-qPCR <sup>1</sup>                   | βglu-E1-F                 | GCCCAGGCTAATATATCACAGCAAG   | 64,1 | 1091                             | -----                            | βglu-E1                |
|                                        | βglu-E1-R                 | GTTGTGCGAAATCACCATACCCTGTC  | 64,9 | 1264                             | -----                            | βglu-E1                |
|                                        | βglu-E2-F                 | TCAACAATCCCACTCCACAAAATTC   | 65,2 | 1041                             | -----                            | βglu-E2                |
|                                        | βglu-E2-R                 | ACCTAAAAGAGCTAACACCTTCAGAGG | 62,7 | 1163                             | -----                            | βglu-E2                |
|                                        | βglu-E3-F                 | GTAGTCAAAGAGTCGTGGAGGACATAG | 62,7 | 503                              | -----                            | βglu-E3                |
|                                        | βglu-E3-R                 | GTGCGTGAATCCCTAGATCGTAG     | 62,2 | 643                              | -----                            | βglu-E3                |
| FL cDNA<br>cloning <sup>2</sup>        | βglu-F1-F                 | GAAAGCTGAGAGGCCAGATGGATAG   | 65,7 | -17                              | -----                            | βglu-F1                |
|                                        | βglu-F1-R                 | CCAAGTGCAGTTGCAGGAATAAATG   | 65,8 | 1549                             | -----                            | βglu-F1                |
| Comparative<br>sequencing <sup>3</sup> | βglu-P1-F                 | GCGATGAGATTTGGTTCCACTGTAG   | 65,1 | -----                            | 8                                | βglu-P1                |
|                                        | βglu-P1-R                 | GAAGCTGGAACCTGATAAGCAGATG   | 64,5 | -----                            | 700                              | βglu-P1                |
|                                        | βglu-S1-F                 | CGCCTTCAACTACGCTATAAATTCTG  | 63,3 | -57                              | 486                              | βglu-S1                |
|                                        | βglu-S1-R                 | GACCAGGAAATAGAAAAACGATAGAGG | 62,6 | 335                              | 1256                             | βglu-S1                |
|                                        | βglu-S2-F                 | GGATGTTGCGGTAGATCAATACCAC   | 64,7 | 240                              | 1007                             | βglu-S2                |
|                                        | βglu-S2-R                 | CGTAGCCATATAATGTAAAGGTCAGCG | 64,7 | 709                              | 1932                             | βglu-S2                |
|                                        | βglu-S3-F                 | CTTTCGGAGACCGTGTGAAGTATTG   | 65,1 | 557                              | 1780                             | βglu-S3                |
|                                        | βglu-S3-R                 | GTTTGAGTATGGCACCATCCAGTTC   | 65,0 | 834                              | 2155                             | βglu-S3                |
|                                        | βglu-S4-F                 | CACATAGCGCCGCTGTCAAAAC      | 67,0 | 731                              | 1954                             | βglu-S4                |
|                                        | βglu-S4-R                 | GTGGGATTGTTGACCGTAAAGTATG   | 62,7 | 1053                             | 2530                             | βglu-S4                |
|                                        | βglu-S5-F                 | GTCGGGGAAGTACCCTGATTCTATG   | 65,0 | 907                              | 2384                             | βglu-S5                |
|                                        | βglu-S5-R                 | TTTATCACTTCCCTCAATCCAGCAG   | 64,7 | 1194                             | 2925                             | βglu-S5                |
|                                        | βglu-S6-F                 | AACGGAGTTTACGTTGGATCCTCTG   | 65,6 | 1118                             | 2731                             | βglu-S6                |
|                                        | βglu-S6-R                 | CCTTATGGCTTCAAGTAGGGATGATAG | 63,4 | 1354                             | 3204                             | βglu-S6                |
|                                        | βglu-S7-F                 | ACTGAGACAGGGTATGGTGATTTTCG  | 64,6 | 1235                             | 2966                             | βglu-S7                |
|                                        | βglu-S7-R                 | CCAAGTGCAGTTGCAGGAATAAATG   | 65,8 | 1549                             | 3488                             | βglu-S7                |
| βglu-S8-F                              | CGAGTGGATATGACTATCGCTTTGG | 65,0                        | 1413 | 3352                             | βglu-S8                          |                        |
| βglu-S8-R                              | CATGGACCTCAACAACAATCTGAG  | 63,0                        | 1705 | 3644                             | βglu-S8                          |                        |

<sup>1</sup> Primers used in RT-qPCR assays for cDNA amplifications of resistant and non-resistant trees to determine the RNA transcript levels of the *Pgβglu-1* gene.

<sup>2</sup> Primers used to amplify the FL cDNA fragment for cloning and sequencing.

<sup>3</sup> Primers used for PCR amplification and sequencing of the *Pgβglu-1* cDNA and genomic sequences.

<sup>4</sup> Position was determined relative to the first coding ATG in the cDNA (negative values are in the 5'-UTR), and relative to the first nucleotide of the available genomic sequence.
