# Supplementary figures and images for: Expression of the β-glucosidase gene Pgβglu-1 underpins natural resistance of white spruce against spruce budworm
Source: PubMed Central journal article supplement — Plant J. 2014 Nov 6;81(1):68–80. doi: 10.1111/tpj.12699 (PMC4404995; doi:10.1111/tpj.12699), 2014-11-06

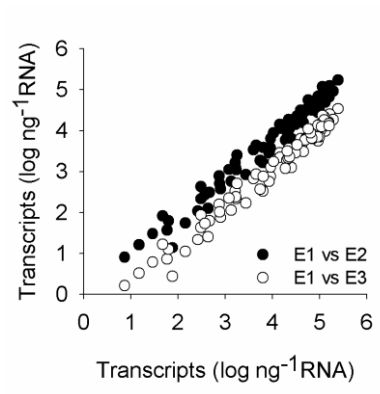

Supplement: tpj0081-0068-sd1.pdf [file tpj0081-0068-sd1.pdf]
